# Supplementary material for: Distribution and establishment of the alien Australian redclaw crayfish, Cherax quadricarinatus, in South Africa and Swaziland
Source: PeerJ. 2017 Apr 19;5:e3135. doi: 10.7717/peerj.3135 (PMC5399870; doi:10.7717/peerj.3135)
Supplement: Data S1 [file peerj-05-3135-s001.xlsx]

## Sheet: K01
Sampling point:	K01
			Date	N
		Traps in	07/12/2015	10
		Traps out	08/12/2015	10
Sampling method	Species	Sex	Cephalothorax length (mm)	Mass (g)	Obs./notes
American trap	C. quadricarinatus	M	69	84
	C. quadricarinatus	F	67	76
American trap	C. quadricarinatus	M	66	76
	C. quadricarinatus	F	62	58
	C. quadricarinatus	M	54	36
American trap	C. quadricarinatus	M	46	66
	C. quadricarinatus	F	45	24
	C. quadricarinatus	F	59	50
American trap	C. quadricarinatus	M	60	48
	C. quadricarinatus	M	57	40
	C. quadricarinatus	M	60	42
	C. quadricarinatus	F	39	12
American trap	C. quadricarinatus	M	54	40
	C. quadricarinatus	M	46	24
American trap	C. quadricarinatus	F	60	52
	C. quadricarinatus	F	64	68	454 eggs
	C. quadricarinatus	F		76	rostrum broken
	C. quadricarinatus	M	56	44
American trap	C. quadricarinatus	F	48	24
	C. quadricarinatus	M	53	36
American trap	C. quadricarinatus	M	65	74
	C. quadricarinatus	F	60	54
American trap	EMPTY
American trap	EMPTY

## Sheet: K02
Sampling point:	K02
			Date	N
		Traps in	05/12/2015	10
		Traps out	06/12/2015	10
Sampling method	Species	Sex	Cephalothorax length (mm)	Mass (g)	Obs./notes
American trap	C. quadricarinatus	F	66	56
American trap	C. quadricarinatus	M	84	130
	C. quadricarinatus	M	70	80
	C. quadricarinatus	M	89	172
	C. quadricarinatus	F	66	72
American trap	EMPTY
American trap	C. quadricarinatus	M	89	174
	C. quadricarinatus	M	69	52
	C. quadricarinatus	M	47	22
	C. quadricarinatus	F	53	38
	C. quadricarinatus	F	51	30
	C. quadricarinatus	M	69	82
	C. quadricarinatus	M	69	68
	C. quadricarinatus	M	44	18
	C. quadricarinatus	F	59	46
	C. quadricarinatus	F	41	16
American trap	C. quadricarinatus	F	75	96
American trap	C. quadricarinatus	F	41	16
	C. quadricarinatus	F	58	36
American trap	C. quadricarinatus	M	51	36
	C. quadricarinatus	F	64	58
	C. quadricarinatus	M	68	62
	C. quadricarinatus	F	53	40
	C. quadricarinatus	F	54	38
	C. quadricarinatus	F	55	42
	C. quadricarinatus	F	51	28
	C. quadricarinatus	F	49	24
	C. quadricarinatus	F	43	16
	C. quadricarinatus	F	46	24
	C. quadricarinatus	M	49	26
	C. quadricarinatus	M	36	8
American trap	C. quadricarinatus	M	91	156
American trap	EMPTY
American trap	EMPTY

## Sheet: K03
Sampling point:	K03
			Date	N
		Traps in	05/12/2015	10
		Traps out	06/12/2015	10
Sampling method	Species	Sex	Cephalothorax length (mm)	Mass (g)	Obs./notes
American trap	C. quadricarinatus	M	54	32
	C. quadricarinatus	F	53	34
	C. quadricarinatus	M	44	16
	C. quadricarinatus	M	69	86
	C. quadricarinatus	M	49	24
	C. quadricarinatus	F	57	38
	C. quadricarinatus	M	49	32
	C. quadricarinatus	F	59	40
	C. quadricarinatus	F	45	20
	C. quadricarinatus	F	46	20
	C. quadricarinatus	M	43	16
	C. quadricarinatus	M	45	22
	C. quadricarinatus	M	36	8
	C. quadricarinatus	M	50	28
	C. quadricarinatus	F	35	8
	C. quadricarinatus	M	44	18
	C. quadricarinatus	M	34	6
American trap	C. quadricarinatus	F	54	34
	C. quadricarinatus	M	48	28
	C. quadricarinatus	M	65	58
	C. quadricarinatus	M	53	34
	C. quadricarinatus	F	45	18
	C. quadricarinatus	M	44	18
	C. quadricarinatus	M	48	26
	C. quadricarinatus	M	39	12
American trap	C. quadricarinatus	M	59	46
	C. quadricarinatus	M	52	28
	C. quadricarinatus	M	58	38
	C. quadricarinatus	M	63	74
	C. quadricarinatus	M	64	54
	C. quadricarinatus	M	45	20
	C. quadricarinatus	M	45	18
	C. quadricarinatus	M	39	12
	C. quadricarinatus	F	40	14
	C. quadricarinatus	F	46	20
	C. quadricarinatus	M	45	18
	C. quadricarinatus	M	40	20
	C. quadricarinatus	F	51	24
	C. quadricarinatus	M	48	24
American trap	C. quadricarinatus	F	48	26
	C. quadricarinatus	M	56	40
	C. quadricarinatus	F	47	20
	C. quadricarinatus	M	59	42
	C. quadricarinatus	M	52	32
	C. quadricarinatus	F	47	20
	C. quadricarinatus	M	58	46
	C. quadricarinatus	F	36	20
	C. quadricarinatus	M	49	22
	C. quadricarinatus	M	41	14
	C. quadricarinatus	M	39	12
American trap	C. quadricarinatus	M	64	70
	C. quadricarinatus	M		54	rostrum broken
	C. quadricarinatus	M	69	64
	C. quadricarinatus	M	59	48
American trap	C. quadricarinatus	M	44	20
	C. quadricarinatus	M	50	24
	C. quadricarinatus	F	55	38
	C. quadricarinatus	M	49	24
	C. quadricarinatus	M	63	68
	C. quadricarinatus	M	48	24
	C. quadricarinatus	F	49	26
	C. quadricarinatus	M	39	14
	C. quadricarinatus	M	47	16
	C. quadricarinatus	M	52	28
	C. quadricarinatus	F	49	24
	C. quadricarinatus	M	62	54
	C. quadricarinatus	F	42	14
	C. quadricarinatus	M	48	24
	C. quadricarinatus	M	39	12
	C. quadricarinatus	F	45	22
	C. quadricarinatus	F	49	18
	C. quadricarinatus	M	55	40
	C. quadricarinatus	M	45	18
	C. quadricarinatus	M	40	14
	C. quadricarinatus	M	39	12
	C. quadricarinatus	F	45	18
	C. quadricarinatus	M	35	8
	C. quadricarinatus	M		12	rostrum broken
	C. quadricarinatus	F	45	18
American trap	C. quadricarinatus	F	70	68
	C. quadricarinatus	M	51	26
	C. quadricarinatus	M	63	38
	C. quadricarinatus	M	51	32
	C. quadricarinatus	F	41	12
	C. quadricarinatus	F	41	12
	C. quadricarinatus	F	38	10
	C. quadricarinatus	F	40	18
	C. quadricarinatus	M	43	16
	C. quadricarinatus	M	49	24
American trap	C. quadricarinatus	F	61	44
	C. quadricarinatus	M	64	62
	C. quadricarinatus	M	60	44
American trap	C. quadricarinatus	M	40	14
American trap	C. quadricarinatus	M	61	64

## Sheet: K04
Sampling point:	K04
			Date	N
		Traps in	20/10/2015	10
		Traps out	21/10/2015	8	rope stolen from 2 traps
Sampling method	Species	Sex	Cephalothorax length (mm)	Mass (g)	Obs./notes
American trap	C. quadricarinatus	M	78	92
American trap	C. quadricarinatus	M	54	34
	C. quadricarinatus	M	85	162
American trap	EMPTY
American trap	EMPTY
American trap	EMPTY
American trap	EMPTY
American trap	EMPTY
American trap	EMPTY

## Sheet: K05
Sampling point:	K05
			Date	N
		Traps in	06/12/2015	8
		Traps out	07/12/2015	8
Sampling method	Species	Sex	Cephalothorax length (mm)	Mass (g)	Obs./notes
American trap	C. quadricarinatus	M	84	150
	C. quadricarinatus	M	59	48
	C. quadricarinatus	M	51	30
	C. quadricarinatus	F	46	20
American trap	C. quadricarinatus	M	66	64
	C. quadricarinatus	M	47	26
	C. quadricarinatus	F	49	26
	C. quadricarinatus	F	47	26
	C. quadricarinatus	F	59	52
	C. quadricarinatus	F	39	14
	C. quadricarinatus	M	49	30
	C. quadricarinatus	F	37	12
	C. quadricarinatus	F	42	18
	C. quadricarinatus	M	39	14
	C. quadricarinatus	F	49	26
	C. quadricarinatus	M	52	30
	C. quadricarinatus	F	42	18
	C. quadricarinatus	M	37	10
	C. quadricarinatus	F	45	20
	C. quadricarinatus	M	51	36
American trap	C. quadricarinatus	M	74	102
	C. quadricarinatus	F	57	44
American trap	C. quadricarinatus	M	74	98
American trap	EMPTY
American trap	EMPTY
American trap	EMPTY
American trap	EMPTY

## Sheet: K06
Sampling point:	K06
			Date	N
		Traps in	06/12/2015	10
		Traps out	07/12/2015	10
Sampling method	Species	Sex	Cephalothorax length (mm)	Mass (g)	Obs./notes
American trap	C. quadricarinatus	M	88	170
	C. quadricarinatus	M	79	104
	C. quadricarinatus	F	45	24
American trap	EMPTY
American trap	C. quadricarinatus	M	98	218
	C. quadricarinatus	F	44	16
American trap	C. quadricarinatus	M	69	68
	C. quadricarinatus	M	73	106
	C. quadricarinatus	M	84	164
	C. quadricarinatus	F	49	24
	C. quadricarinatus	F		14	rostrum broken
American trap	EMPTY
American trap	EMPTY
American trap	EMPTY
American trap	EMPTY
American trap	EMPTY
American trap	EMPTY

## Sheet: L01
Sampling point:	L01
			Date	N
		Traps in	03/12/2015	10
		Traps out	04/12/2015	10
Sampling method	Species	Sex	Cephalothorax length (mm)	Mass (g)	Obs./notes
American trap	EMPTY
American trap	C. quadricarinatus	F	37	30
American trap	EMPTY
American trap	EMPTY
American trap	EMPTY
American trap	EMPTY
American trap	EMPTY
American trap	EMPTY
American trap	EMPTY
American trap	EMPTY

## Sheet: L02
Sampling point:	L02
			Date	N
		Traps in	04/12/2015	5
		Traps out	05/12/2015	5
Sampling method	Species	Sex	Cephalothorax length (mm)	Mass (g)	Obs./notes
American trap	C. quadricarinatus	M	95	192
American trap	EMPTY
American trap	EMPTY
American trap	EMPTY
American trap	EMPTY

## Sheet: MB01
Sampling point:	MB01
			Date	N
		Traps in	27/02/2016	6
		Traps out	28/02/2016	6
Sampling method	Species	Sex	Cephalothorax length (mm)	Mass (g)	Obs./notes
American trap	C. quadricarinatus	M	49	21
American trap	C. quadricarinatus	F	63	46
	C. quadricarinatus	M	78	82
	C. quadricarinatus	F	81	113
	C. quadricarinatus	M	73	77
	C. quadricarinatus	M	63	54
	C. quadricarinatus	M	55	34
	C. quadricarinatus	M	66	55
	C. quadricarinatus	F	35	7
	C. quadricarinatus	F	50	23
	C. quadricarinatus	F	54	33
	C. quadricarinatus	F	53	34
	C. quadricarinatus	F	43	15
	C. quadricarinatus	F	60	44
	C. quadricarinatus	M	50	25
American trap	C. quadricarinatus	M	67	65
	C. quadricarinatus	M	65	65
	C. quadricarinatus	F	56	36
	C. quadricarinatus	M	66	61
	C. quadricarinatus	F	49	22
	C. quadricarinatus	M	45	18
	C. quadricarinatus	M	51	23
	C. quadricarinatus	M	76	98
	C. quadricarinatus	M	74	85
	C. quadricarinatus	M	68	59
	C. quadricarinatus	M	55	36
	C. quadricarinatus	M	64	54
American trap	EMPTY
American trap	EMPTY
American trap	EMPTY

## Sheet: MB02
Sampling point:	MB02
			Date	N
		Traps in	27/02/2016	8
		Traps out	28/02/2016	8
Sampling method	Species	Sex	Cephalothorax length (mm)	Mass (g)	Obs./notes
American trap	EMPTY
American trap	C. quadricarinatus	M	69	75
	C. quadricarinatus	M	69	73
	C. quadricarinatus	M	29	5
American trap	C. quadricarinatus	F	62	49
	C. quadricarinatus	M	74	111
American trap	C. quadricarinatus	F	54	33
	C. quadricarinatus	M	56	38
	C. quadricarinatus	M	82	117
American trap	EMPTY
American trap	EMPTY
American trap	EMPTY
American trap	EMPTY

[truncated: 11 more sheets: ML01, ML02, US01, US02, USCh, D01, D02, D03, D04, D05, D06]
