# Supplementary material for: Distribution and establishment of the alien Australian redclaw crayfish, Cherax quadricarinatus, in South Africa and Swaziland
Source: PeerJ. 2017 Apr 19;5:e3135. doi: 10.7717/peerj.3135 (PMC5399870; doi:10.7717/peerj.3135)
Supplement: Data S2 [file peerj-05-3135-s002.xlsx]

## Sheet: K01
Sampling point:	K01
			Date	N
		Traps in	07/05/2016	10
		Traps out	08/05/2016	10
Sampling method	Species	Sex	Cephalothorax length (mm)	Mass (g)	Obs./notes
American trap	C. quadricarinatus	F	61.2192	58
	C. quadricarinatus	F	56.9481	54
	C. quadricarinatus	M	51.2533	34
	C. quadricarinatus	F	59.7955	48
	C. quadricarinatus	F	45.5585	22
	C. quadricarinatus	F	52.677	32
	C. quadricarinatus	M	45.5585	24
	C. quadricarinatus	M	113.896	51
	C. quadricarinatus	M	68.3377	76
	C. quadricarinatus	F	42.7111	16
	C. quadricarinatus	M	46.9822	22
	C. quadricarinatus	M	35.5926	10
	C. quadricarinatus	M	49.8296	30
	C. quadricarinatus	M	35.5926	10
	C. quadricarinatus	M	39.8637	14
	C. quadricarinatus	M	44.1348	22
American trap	C. quadricarinatus	F	59.7955	48
American trap	C. quadricarinatus	F	41.2874	14
American trap	C. quadricarinatus	M	72.6088	106
American trap	C. quadricarinatus	M	34.1689	10
American trap	C. quadricarinatus	M	56.9481	40
	C. quadricarinatus	M	59.7955	48
	C. quadricarinatus	M	48.4059	24
	C. quadricarinatus	F	48.4059	26
	C. quadricarinatus	F	55.5244	36
	C. quadricarinatus	F	49.8296	32
	C. quadricarinatus	M	39.8637	14
	C. quadricarinatus	F	35.5926	10
American trap	C. quadricarinatus	M	62.6429	58
American trap	C. quadricarinatus	F	49.8296	26
	C. quadricarinatus	F	46.9822	26
	C. quadricarinatus	F	58.3718	46
American trap	EMPTY
American trap	EMPTY

## Sheet: K02
Sampling point:	K02
			Date	N
		Traps in	08/05/2016	7
		Traps out	09/05/2016	7
Sampling method	Species	Sex	Cephalothorax length (mm)	Mass (g)	Obs./notes
American trap	C. quadricarinatus	M	54.1007	40
	C. quadricarinatus	M	41.2874	40
	C. quadricarinatus	F	41.2874	16
	C. quadricarinatus	F	55.5244	48
	C. quadricarinatus	F	45.5585	22
American trap	C. quadricarinatus	F	44.1348	42
American trap	C. quadricarinatus	M	69.7614	80
	C. quadricarinatus	M	45.5585	20
American trap	C. quadricarinatus	M	76.8799	124
	C. quadricarinatus	M	92.5407	184
American trap	EMPTY
American trap	EMPTY
American trap	EMPTY

## Sheet: K03
Sampling point:	K03
			Date	N
		Traps in	08/05/2016	7
		Traps out	09/05/2016	7
Sampling method	Species	Sex	Cephalothorax length (mm)	Mass (g)	Obs./notes
American trap	C. quadricarinatus	F	55.5244	40
	C. quadricarinatus	M	58.3718	40
	C. quadricarinatus	M	54.1007	40
	C. quadricarinatus	F	45.5585	22
	C. quadricarinatus	F	52.677	30
	C. quadricarinatus	F	48.4059	26
American trap	C. quadricarinatus	M	79.7274	100
American trap	C. quadricarinatus	M	92.5407	182
American trap	C. quadricarinatus	F	44.1348	24
	C. quadricarinatus	F	51.2533	28
	C. quadricarinatus	M	52.677	36
American trap	C. quadricarinatus	M	41.2874	18
	C. quadricarinatus	M	42.7111	18
	C. quadricarinatus	F	44.1348	20
	C. quadricarinatus	M	48.4059	30
	C. quadricarinatus	F	55.5244	38
	C. quadricarinatus	F	44.1348	22
	C. quadricarinatus	F	62.6429	58
	C. quadricarinatus	F	52.677	34
	C. quadricarinatus	M	52.677	30
	C. quadricarinatus	F	49.8296	28
	C. quadricarinatus	M	64.0666	72
	C. quadricarinatus	M	45.5585	22
	C. quadricarinatus	M	54.1007	38
	C. quadricarinatus	M	48.4059	22
	C. quadricarinatus	F	38.44	12
American trap	C. quadricarinatus	M	71.1851	86
	C. quadricarinatus	F	42.7111	16
American trap	C. quadricarinatus	M	61.2192	56
	C. quadricarinatus	F	45.5585	24
	C. quadricarinatus	F	54.1007	36

## Sheet: K05
Sampling point:	K05
			Date	N
		Traps in	10/05/2016	7
		Traps out	11/05/2016	7
Sampling method	Species	Sex	Cephalothorax length (mm)	Mass (g)	Obs./notes
American trap	C. quadricarinatus	F	64.0666	60
	C. quadricarinatus	F	61.2192	52
	C. quadricarinatus	F	61.2192	52
	C. quadricarinatus	M	56.9481	40
	C. quadricarinatus	M	46.9822	24
	C. quadricarinatus	F	74.0325	88
	C. quadricarinatus	F	64.0666	56
	C. quadricarinatus	M	56.9481	40
	C. quadricarinatus	F	59.7955	54
	C. quadricarinatus	M	68.3377	74
	C. quadricarinatus	M	48.4059	28
	C. quadricarinatus	F	61.2192	48
	C. quadricarinatus	M	69.7614	80
	C. quadricarinatus	M	76.8799	104
	C. quadricarinatus	F	59.7955	44
	C. quadricarinatus	F	61.2192	50
	C. quadricarinatus	F	74.0325	78
	C. quadricarinatus	M	75.4562	104
	C. quadricarinatus	M	65.4903	64
	C. quadricarinatus	M	65.4903	56
	C. quadricarinatus	F	66.914	68
	C. quadricarinatus	F	61.2192	46
	C. quadricarinatus	F	62.6429	58
	C. quadricarinatus	M	51.2533	28
	C. quadricarinatus	F	61.2192	48
	C. quadricarinatus	M	45.5585	24
	C. quadricarinatus	F	58.3718	46
	C. quadricarinatus	F	62.6429	56
	C. quadricarinatus	F	58.3718	42
	C. quadricarinatus	M	39.8637	12
	C. quadricarinatus	F	71.1851	74
	C. quadricarinatus	F	58.3718	44
	C. quadricarinatus	M	61.2192	48
American trap	C. quadricarinatus	M	85.4222	126
	C. quadricarinatus	F	61.2192	46
	C. quadricarinatus	M	68.3377	74
	C. quadricarinatus	M	59.7955	44
	C. quadricarinatus	F	59.7955	48
American trap	C. quadricarinatus	F	64.0666	64
American trap	C. quadricarinatus	M	66.914	68
	C. quadricarinatus	M	75.4562	88
	C. quadricarinatus	F	71.1851	84
	C. quadricarinatus	F	69.7614	74
	C. quadricarinatus	F	62.6429	56
	C. quadricarinatus	M	65.4903	64
	C. quadricarinatus	M	79.7274	114
	C. quadricarinatus	F	72.6088	86
	C. quadricarinatus	F	71.1851	70
American trap	C. quadricarinatus	M	64.0666	66
American trap	EMPTY
American trap	EMPTY

## Sheet: K06
Sampling point:	K06
			Date	N
		Traps in	10/05/2016	7
		Traps out	11/05/2016	7
Sampling method	Species	Sex	Cephalothorax length (mm)	Mass (g)	Obs./notes
American trap	C. quadricarinatus	F	64.0666	58
	C. quadricarinatus	M	95.3881	204
	C. quadricarinatus	M	86.8459	142
American trap	C. quadricarinatus	M	76.8799	154
	C. quadricarinatus	M	96.8118	240
	C. quadricarinatus	M	92.5407	226
	C. quadricarinatus	M	99.6592	250
American trap	EMPTY
American trap	EMPTY
American trap	EMPTY
American trap	EMPTY
American trap	EMPTY

## Sheet: L01
Sampling point:	L01
			Date	N
		Traps in	09/05/2016	7
		Traps out	10/05/2016	7
Sampling method	Species	Sex	Cephalothorax length (mm)	Mass (g)	Obs./notes
American trap	C. quadricarinatus	M	81.1511	148
	C. quadricarinatus	M	92.5407	212
American trap	C. quadricarinatus	M	78.3037	136
	C. quadricarinatus	M	54.1007	30
American trap	C. quadricarinatus	F	45.5585	18
American trap	EMPTY
American trap	EMPTY
American trap	EMPTY
American trap	EMPTY

## Sheet: L03
Sampling point:	L03
			Date	N
		Traps in	09/05/2016	5
		Traps out	10/05/2016	5
Sampling method	Species	Sex	Cephalothorax length (mm)	Mass (g)	Obs./notes
American trap	EMPTY
American trap	EMPTY
American trap	C. quadricarinatus	F	98.2355	190
American trap	EMPTY
American trap	EMPTY

## Sheet: MB01
Sampling point:	MB01
			Date	N
		Traps in	02/08/2016	8
		Traps out	03/08/2016	8
Sampling method	Species	Sex	Cephalothorax length (mm)	Mass (g)	Obs./notes
American trap	C. quadricarinatus	F	28	13
	C. quadricarinatus	F	20	5
	C. quadricarinatus	M	27	13
	C. quadricarinatus	M	22	7
American trap	EMPTY
American trap	C. quadricarinatus	M	40	37
American trap	C. quadricarinatus	M	32	21
	C. quadricarinatus	M	25	9
American trap	C. quadricarinatus	F	34	28
American trap	EMPTY
American trap	EMPTY
American trap	EMPTY

## Sheet: MB02
Sampling point:	MB02
			Date	N
		Traps in	02/08/2016	7
		Traps out	03/08/2016	7
Sampling method	Species	Sex	Cephalothorax length (mm)	Mass (g)	Obs./notes
American trap	C. quadricarinatus	M	24	8
	C. quadricarinatus	M	68	232
	C. quadricarinatus	M	48	150
American trap	C. quadricarinatus	M	45	59
	C. quadricarinatus	F	48	77
	C. quadricarinatus	M	61	151
American trap	C. quadricarinatus	F	50	85
American trap	EMPTY
American trap	EMPTY
American trap	EMPTY
American trap	EMPTY

## Sheet: ML02
Sampling point:	ML02
			Date	N
		Traps in	02/08/2016	7
		Traps out	03/08/2016	7
Sampling method	Species	Sex	Cephalothorax length (mm)	Mass (g)	Obs./notes
American trap	EMPTY
American trap	EMPTY
American trap	EMPTY
American trap	C. quadricarinatus	F	29	15
American trap	C. quadricarinatus	F	28	14
	C. quadricarinatus	F	40	44
American trap	C. quadricarinatus	F	24	9
	C. quadricarinatus	F	35	27
American trap	C. quadricarinatus	M	29	13

[truncated: 8 more sheets: US01, US02, USCh, D01, D02, D04, D05, D06]
